# Supplementary material for: Impact of SARS-CoV-2 variant on the severity of maternal infection and perinatal outcomes: Data from the UK Obstetric Surveillance System national cohort
Source: medRxiv preprint, doi:10.1101/2021.07.22.21261000, version 1 (2021-07-25)
Supplement: Supplementary Figure 1 and 2 [file 261000_file03.docx]

**Supplementary Figure 1: Women included in study from 1st March 2020 to 11th July 2021**


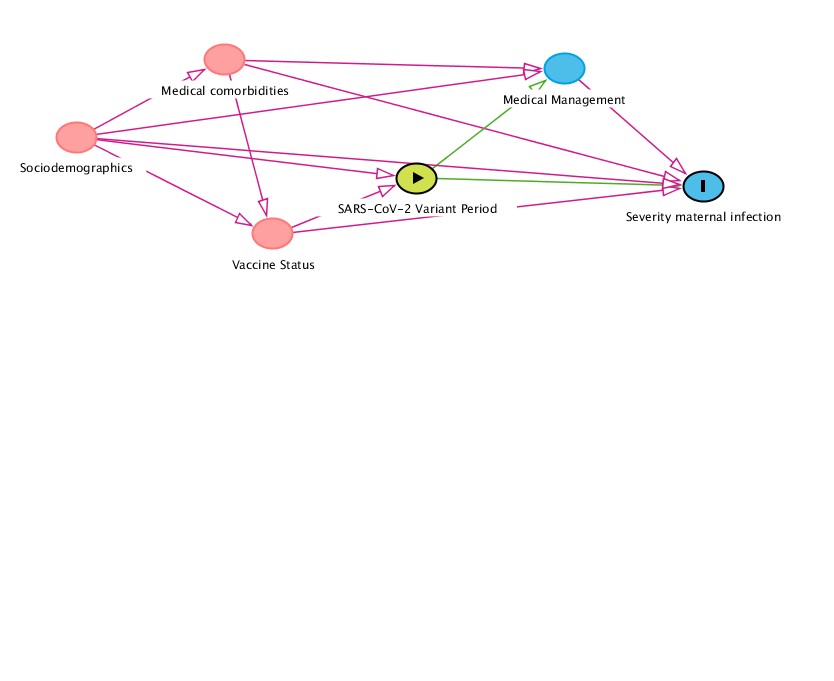


**Supplementary Figure 2: Directed acyclic graphs indicating covariates and mediators on relationship between SARS-CoV-2 variant and severity of maternal infection.**
